# Title

**Super-resolved imaging deciphers ligand dependent membrane behaviour of the onco-immunogenic CCR5 receptor.**

# Authors

Patrick Hunter<sup>1</sup>, Alex L. Payne-Dwyer<sup>1</sup>, Michael Shaw<sup>2,3</sup>, Nathalie Signoret<sup>4</sup> and Mark C. Leake<sup>1\*</sup>

<sup>1</sup>Departments of Physics and Biology, University of York, YO10 5DD, UK

<sup>2</sup>National Physical Laboratory, Hampton Road, Teddington, Middlesex, TW11 0LW

<sup>3</sup>Department of Computer Science, University College London, London, WC1E 6EA, UK

<sup>4</sup>Hull York Medical School, University of York, YO10 5DD, UK

\*Correspondence: [mark.leake@york.ac.uk](mailto:mark.leake@york.ac.uk)

# Highlights

- We use SIM and novel PaTCH microscopy for precise bioimaging and single-molecule tracking of receptor protein CCR5 in model cell lines
- By tracking the position of CCR5 assemblies we conclude that they are clustered in the plasma membrane beyond a level expected from a random distribution
- We use these high precision data to determine molecular stoichiometries of CCR5 assemblies

# Summary

The ability of tumors to establish a pro-tumorigenic microenvironment is becoming an important point of investigation in the search for new therapeutics. Tumors form microenvironments in part by the “education” of immune cells attracted via chemotactic axes such as that of CCR5-CCL5. Further, CCR5 upregulation by cancer cells, coupled with its association with pro-tumorigenic features such as drug-resistance and metastasis, has suggested CCR5 as a target for therapeutic inhibition. However, with several conformational ‘pools’ being reported, phenotypic investigations must be capable of unveiling heterogeneity. Addressing this challenge, we performed structured illumination (SIM) and Partially TIRF coupled HILO (PaTCH) microscopy for super-resolution imaging and single-molecule imaging of CCR5 in fixed cells. Determining the positions of super-resolved CCR5 assemblies revealed a non-random spatial orientation. Further, intensity-tracking of assemblies revealed a distribution of

molecular stoichiometries indicative of dimeric sub-units independent of CCL5 perturbation. These biophysical methods can provide important insights into the structure and function of onco-immunogenic receptors and a plethora of other biomolecules.

## Introduction

The mechanism by which cancer cells obtain immune evasive features remains an open question. However, current research indicates that cancer cells are able to manipulate chemokine networks to support tumour progression, with the main chemotactic axis utilised being that of C-C chemokine receptor type 5 (CCR5) and its ligand C-C chemokine ligand type 5 (CCL5) (Aldinucci et al., 2020; Jiao et al., 2019; Upadhyaya et al., 2020). CCR5 is a member of the seven transmembrane family of G protein coupled receptors (GPCRs) and is found in various white blood cells including T-cells and macrophages. CCR5 responds to a range of chemokines, such as CCL5, known to induce chemotaxis towards sites of immune response (Aldinucci and Colombatti, 2014). Despite this immunogenic feature of the CCR5-CCL5 axis, cancer cells are capable of “educating” migrating immune cells to form an immunosuppressive tumor microenvironment (Aldinucci et al., 2019; Chang et al., 2012; Tan et al., 2009). Further, oncogenic transformation of cells has been shown to increase the surface expression of CCR5 (Erreni et al., 2009; Mañes et al., 2003; Sales et al., 2014; Vaday et al., 2006). As a result, CCR5 has become a strong point of investigation in studies relating to both immunology and cancer.

Studies have linked the upregulation of CCR5 by cancer cells with poor prognosis for patients, with the CCR5-CCL5 axis being found to aid in tumor growth, metastasis and drug-resistance amongst other pro-tumorigenic features (Aldinucci et al., 2008; Aldinucci and Casagrande, 2018; Vaday et al., 2006). These investigations have culminated in the consideration of the CCR5-targeted drug Maraviroc, previously utilised as a therapeutic for HIV, to be repurposed as a clinical treatment for cancer patients (Aldinucci et al., 2020; Haag et al., 2020; Miao et al., 2020). It is clear that the CCR5-CCL5 axis plays an important role in both immune dynamics and tumor progression, and that investigations into the behaviour of CCR5 along the surface membrane are likely to be beneficial in the development of new therapeutics.

Previous studies investigating the antigenic behaviour of CCR5 suggest the existence of multiple conformational subpopulations of CCR5, an observation that is derived from the characteristic recognition of structurally distinct ligands by varying proportions of cell surface CCR5 (Colin et al., 2018, 2013; Fox et al., 2015; Weichseldorfer et al., 2022). Further, CCR5 has been shown to exist in both homodimeric and heterodimeric states, with the homodimerization of CCR5 being shown to take place in the endoplasmic reticulum before reaching the cell surface (Jin et al., 2018), any downstream clustering would therefore be expected to carry a periodicity in apparent stoichiometry of two molecules (Martínez-Muñoz et al., 2018b). Considering that the various purported conformational and oligomeric states of CCR5 exhibit downstream effects on the receptor chemotactic functionality (Berro et al., 2011; Colin et al., 2013), the nature of this heterogeneity requires further investigation.

Although earlier single-molecule studies have been carried out using GPCRs (Joseph et al., 2021; Kasai and Kusumi, 2014; Tian et al., 2017), previous investigations into the oligomeric status of CCR5 in particular have been focused within the bulk ensemble regime, utilising techniques such as standard fluorescence confocal microscopy, flow cytometry and western blotting (Colin et al., 2018; Jin et al., 2018). Through the extension of cell-surface CCR5 investigations to include 3D super-resolution microscopy and high-speed single-molecule tracking, here we have been able to visualise CCR5 expression with a spatial resolution twice that of the optical diffraction limit as well as provide stoichiometry estimates based on single-molecule measurements, thereby unveiling the heterogeneity lost by bulk ensemble techniques. Further, studying the effects of ligand perturbations make it possible to draw additional conclusions regarding the effects of CCL5 binding on the cell surface expression of CCR5.

Here, we introduce a study which utilises the accompaniment of two light microscopy techniques, chosen for their high spatial and temporal and resolution. Our study employs structured illumination microscopy (SIM) for the investigation of cell surface CCR5 distributions within CHO-CCR5 cells, a cell line utilised in multiple previous studies (Mack et al., 1998; Signoret et al., 2005, 2004, 2000). Also, through the creation of a new line of transfected CHO cells, which express CCR5 N-terminally fused to GFP to a level compatible with single-molecule microscopy, it has been possible to provide single-molecule stoichiometry estimates using a newly developed microscopy technique that combines the high signal-to-noise ratio of total internal reflection fluorescence (TIRF) microscopy whilst benefiting from the increased penetration depth of Highly Inclined and Laminated Optical sheet (HILO) microscopy (Tokunaga et al., 2008). The development of this new imaging mode, that we denote Partially TIRF coupled HILO (PaTCH) microscopy, aims to allow the study of transmembrane proteins in cells exhibiting a complex basal membrane topology. PaTCH is able to probe membrane invaginations that exceed the penetration depth of traditional TIRF microscopy whilst retaining the high signal-to-noise ratio of molecules close to the coverslip surface. We then demonstrate how these methods can be used to investigate the surface expression and aggregation of CCR5 after exposure to the receptor's CCL5 ligand.

# Results

## SIM reveals CCR5 as distinct puncta distributed throughout the cell membrane in 3D

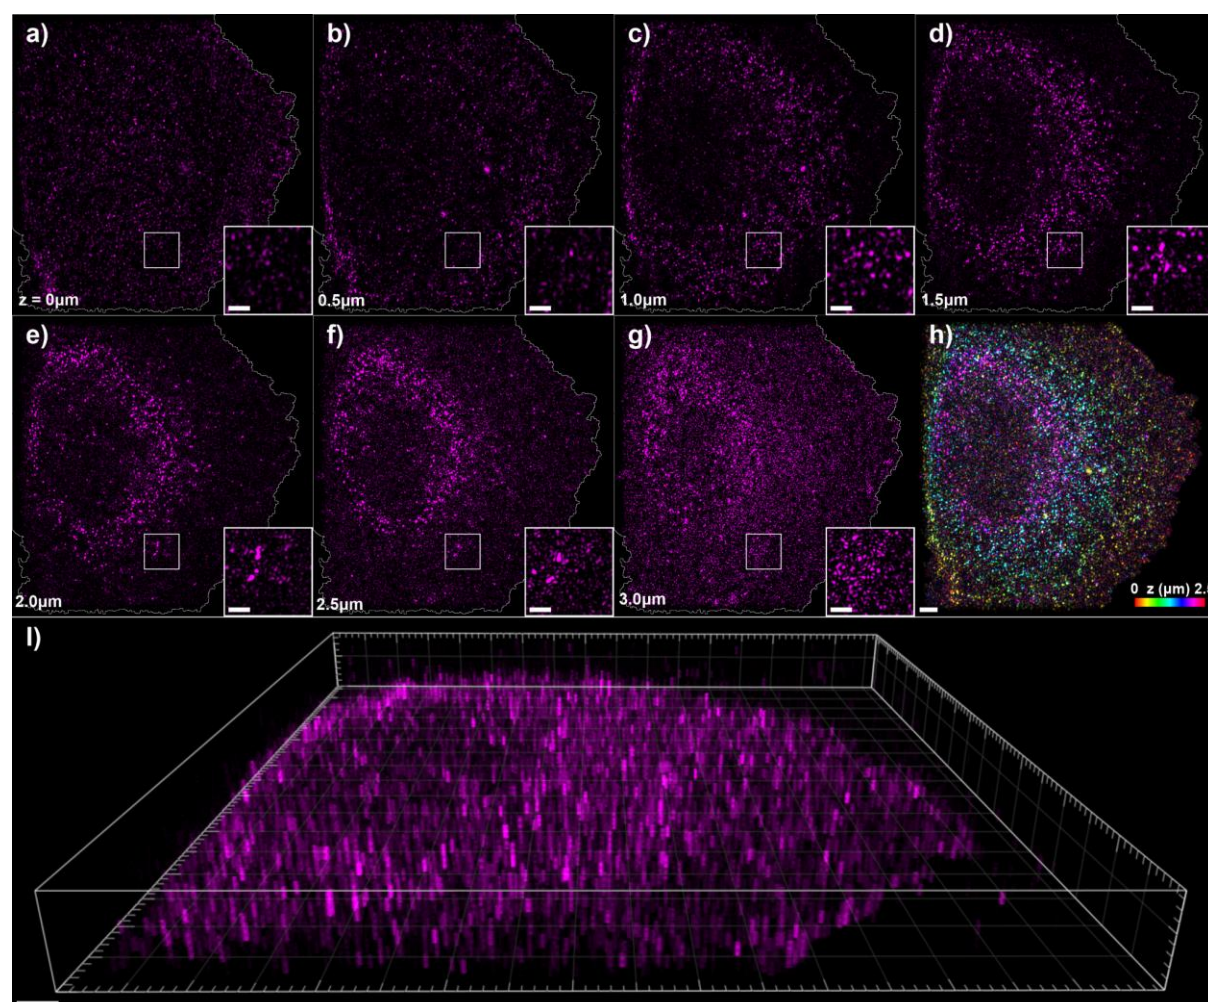

**Figure 1. SIM images of CHO-CCR5 cells labeled with DyLight 650.** a - g) Individual SIM image planes of a CHO-CCR5 cell, from the basal membrane through to the apical membrane in 500 nm steps, displaying cell boundary segmentation and magnified insets. h) Color depth projection over the images shown in a-f). i) 3D reconstruction of cell images shown in a-g). (Scale bar 2  $\mu\text{m}$ , (magnified insets 1  $\mu\text{m}$ )).

Initial investigations aimed to visualise the distribution of CCR5 in CHO-CCR5 cells, for which previous bulk ensemble studies had been performed. For this purpose, SIM was used to acquire super-resolution images of fluorescently labeled CHO-CCR5 (Figure 1 a-g). Representation of these images included the correction of photobleaching effects on the fluorescence intensity, the exclusion of background fluorescence located outside the cell as well as the inclusion of magnified insets of the CCR5 puncta. From these images we see that membrane-bound CCR5 assemblies appear as distinct puncta throughout the entire plasma membrane. Puncta appear uniformly distributed along the basal membrane and begin to form annular cross-



sections towards the apical membrane. Despite the increase in background fluorescence seen in Figure 1 g) due to photobleaching correction, the annular distribution of fluorescent foci is clearly retained. Finally, acquisition of optically sectioned slices allowed the reconstruction of color depth projections, as well as 3D images and movies, as shown in Figure 1 h, i) and Supplementary movie 1. These reconstructions enable the visualisation of this annular distribution of cell surface CCR5, thereby revealing the topology of the cellular exterior while further highlighting the uniformity of the CCR5 distribution.

## Clustering behavior of CCR5 assemblies is revealed through Ripley's H function based analysis

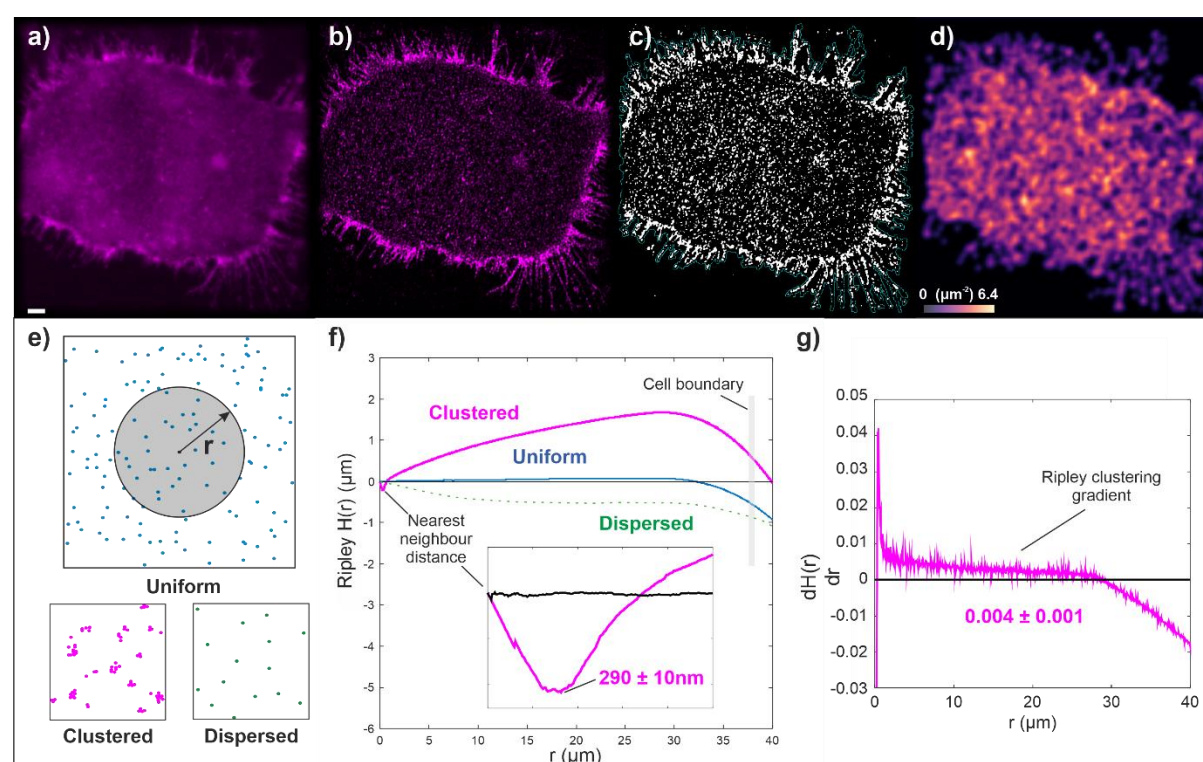

**Figure 2. Images and quantitative clustering metrics of CCR5 in the basal membrane of CHO-CCR5 cells labeled with DyLight 650.** a) Widefield image of the basal membrane of a representative CHO-CCR5 cell (scale bar 2  $\mu\text{m}$ ). b) SIM reconstruction of the same cell. c) Binarized mask of the SIM image displaying thresholded CCR5 puncta. d) Number density distribution of individual puncta centroids, ranging from 0 - 6.4  $\mu\text{m}^{-2}$ . e) Illustration demonstrating the function of Ripley's H analysis in the investigation of uniform, clustered and dispersed point distributions. f) Distribution of Ripley's H values for a real representative CHO-CCR5 cell (magenta) and a generated 2D map of points whose displacement separations are sampled from a random Poisson distribution (blue). Also shown is an illustrative curve depicting the expected results of a generic dispersed point distribution (green dotted). Inset figure shows the same distribution of Ripley's H values for the CHO-CCR5 cell (magenta) and random point distribution (blue) over a range of 0 - 1  $\mu\text{m}$  and provides an average nearest-neighbor distance for binarized CHO-CCR5 puncta

( $N=10$  cells). g) *The gradient of the distribution of Ripley's H values for the CHO-CCR5 cell represented in f) and provides a modal average clustering gradient for CHO-CCR5 ( $N=10$  cells).*

Mammalian cells present a variety of cell morphologies, including membrane protrusions which can be caused by a stress response to sample preparation. Although these filopodia are not of high biological relevance to this investigation, the extensions of the representative cell shown in Figure 2 a-d) provide a clear illustration of the increased image quality (higher spatial resolution and image contrast) of SIM over traditional widefield microscopy. This improved image quality, coupled with the optical sectioning property of SIM, aid quantitative analysis of image data and enable puncta of CCR5 assemblies to be isolated from the cellular background through intensity thresholding as shown in Figure 2 c). Closer investigation of these isolated puncta reveals a spatial distribution with distinct 'hot spots' as shown in Figure 2 d). These results indicate the existence of spatial clustering of individual puncta. To analyse this further, we performed clustering analysis using Ripley's H function (Kiskowski et al., 2009) on the centroids of isolated clusters. As represented in Figure 2 e), this method is based on the counting of objects at increasing distance averaged over all possible origin points inside the cell, and can be used to describe the level of clustering, uniformity or dispersion of points. By visualising the Ripley's H values as a function of radius spanning the diameter of the cell's basal membrane, we see that net clustering of points is characterised by accumulation of positive Ripley's H values across the cell, as shown in Figure 2 f-g). The modal clustering gradient thereby provides an estimation of the spatial correlation of CCR5 puncta throughout the cell, with the modal average gradient of CHO-CCR5 cells found to be positive:  $dH(r)/dr = 0.004 \pm 0.001$ . The initial minima displayed in the Ripley's H value distribution provides an estimate for the nearest neighbor distance between CCR5 puncta, with the average for CHO-CCR5 cells being found to be  $290 \pm 10$  nm.

# Clones of GFP-CCR5 CHO cells developed for PaTCH microscopy and characterised using flow cytometry

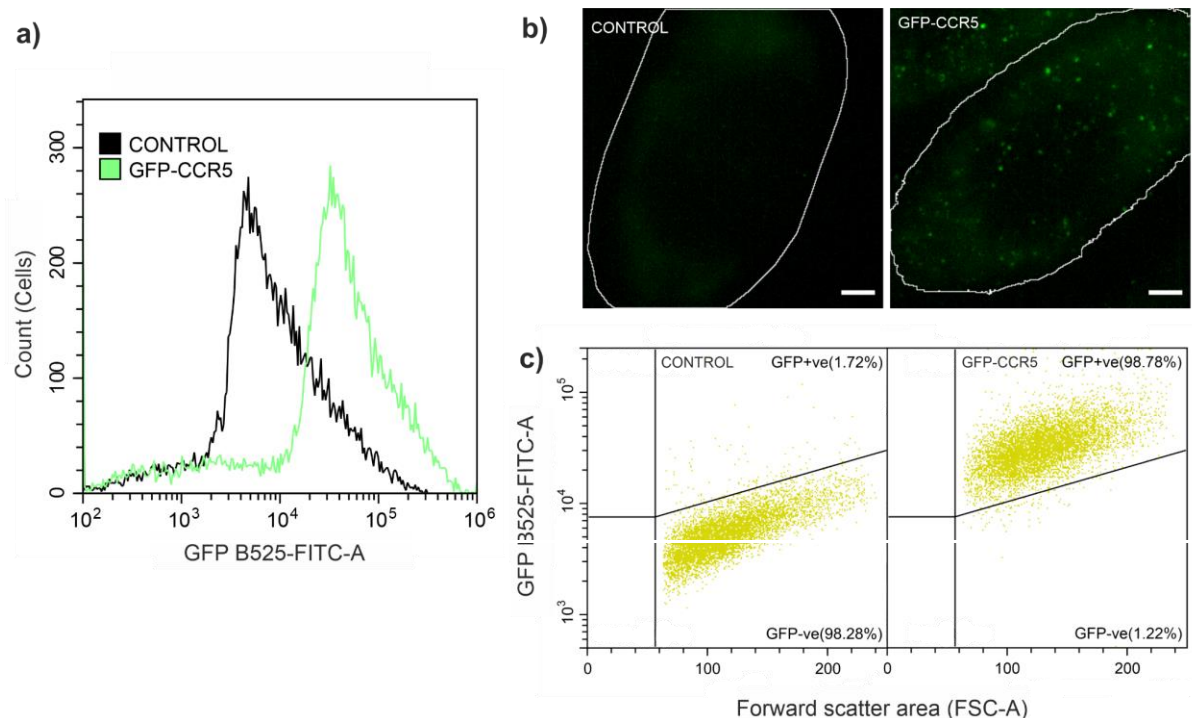

**Figure 3. Characterisation of GFP-CCR5 expression in transfected CHO cells using flow cytometry and PaTCH microscopy confirms increase above control samples.** a) Distribution of GFP emission intensity over several hundred cells for both control and GFP-CCR5 positive samples. b) PaTCH images of the basal membrane of both control and GFP-CCR5 positive cells. c) Scatterplot of GFP-range emission intensity against the forward scatter area of both control and GFP-CCR5 positive cells. Both a) and c) show cell populations after gating to remove debris and doublets.

To determine structural characteristics of the CCR5 assemblies, we performed single-molecule PaTCH microscopy-based studies to measure the number of molecules present in assemblies, which we denote as the stoichiometry. While PaTCH benefits from the simplicity of constitutively fluorescent probes and does not require photoswitchable or photoactivatable probes (Jin et al., 2021; Yuan et al., 2021), the successful investigation of individual CCR5 assemblies using PaTCH microscopy does rely on fluorescent proteins being expressed to a level compatible with single-molecule localization microscopy. For this purpose, CHO cells transfected to express GFP-CCR5 fusion proteins underwent single-cell cloning to create several populations with varying levels of expression. Figure 3 shows one such population, optimised for single-molecule imaging. Figure 3 a-c), despite exhibiting a low expression suitable for single-molecule studies, the GFP expression of the positive sample is significantly higher than that of the control in both flow cytometry and microscopy-based experiments, providing confidence in this new model for CCR5 investigations.

# PaTCH investigation of basal membrane GFP-CCR5 also reveals CCR5 assemblies as small puncta

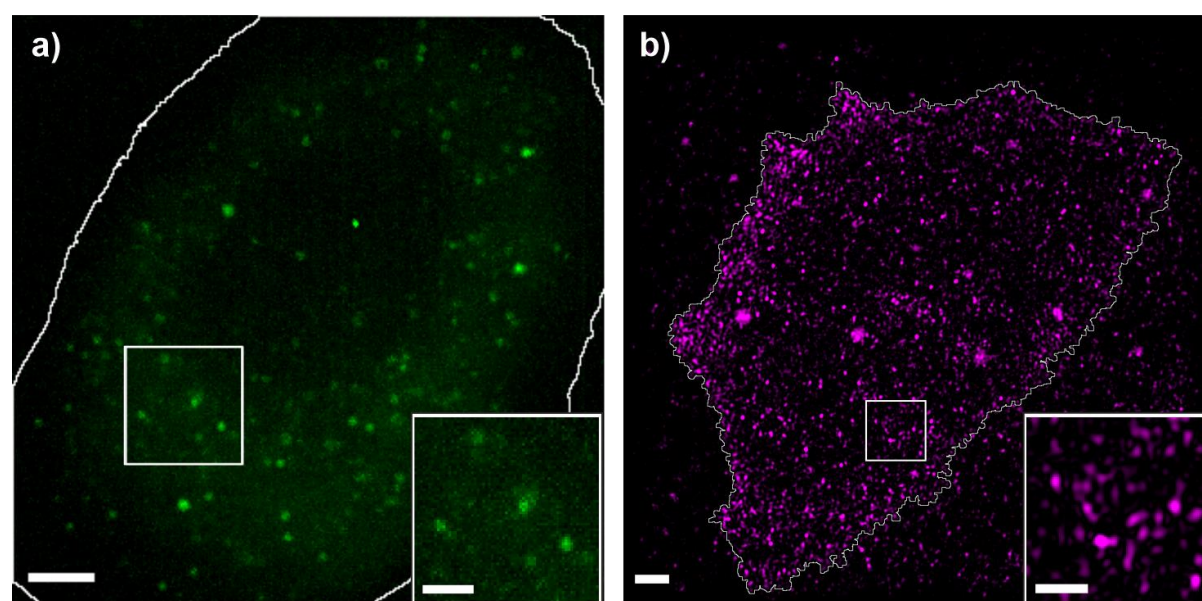

**Figure 4. Comparison of GFP-CCR5 CHO cells with established CHO-CCR5 cells.** Fluorescent labels shown to be distributed in distinct puncta across cellular membranes in a) GFP-CCR5 expressing CHO cells imaged using PaTCH microscopy and b) DyLight 650 labeled CHO-CCR5 cells imaged using SIM. Cell boundary segmentation shown in white. (Scale bar 2  $\mu$ m, (magnified insets 1  $\mu$ m)).

As can be seen in Figure 4 a), despite a reduction in expression, GFP-CCR5 forms distinct puncta across the basal membrane of transfected CHO cells in a qualitatively similar distribution to that of DyLight 650 labeled CCR5 in CHO-CCR5 cells, as shown in Figure 4 b). Although the increased spatial resolution of SIM images provides improved segmentation of CCR5 puncta for the determination of spatial clustering, high-speed PaTCH microscopy allows the determination of time-dependent processes such as dye photobleaching effects. Although further studies are required into the accurate determination of puncta diameter in both respective cell models, the general uniformity in the size of CCR5 puncta between both cell models provides confidence that any spatial dependence in CCR5 expression between these two is related.



# Stoichiometry measurements reveal CCR5 assemblies to comprise homodimers

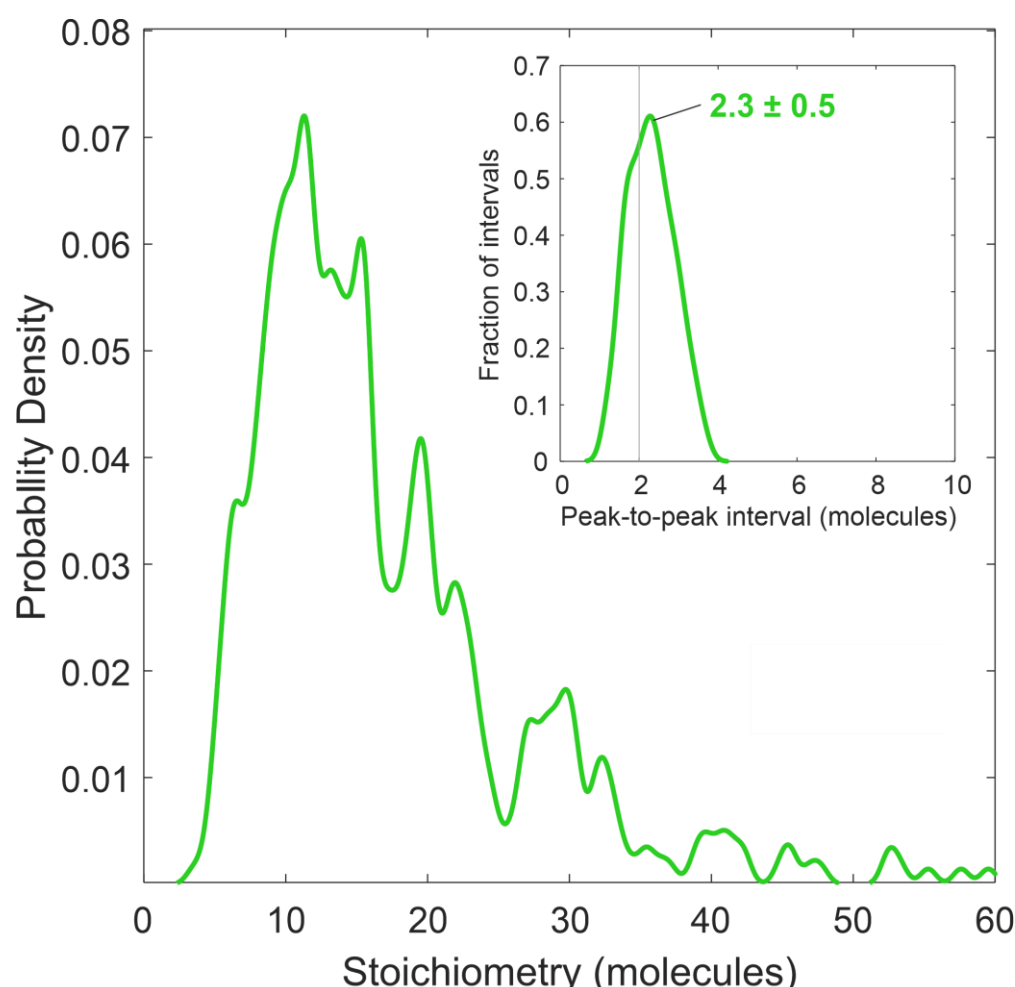

**Figure 5. Periodic stoichiometry distribution indicates that CCR5 assemblies comprise dimeric subunits.** Kernel density estimates of stoichiometry and (inset) periodic stoichiometry intervals of GFP-CCR5 associated foci ( $N=460$  tracks) detected by PaTCH microscopy in GFP-CCR5 transfected CHO cells ( $N=9$  cells). Kernel width = 0.6 molecules.

Through the measurement of the fluorescence intensity of individual GFP-CCR5 foci acquired using PaTCH microscopy, we were able to determine estimates for the stoichiometry of these assemblies. A wide distribution of stoichiometries are revealed by collating all detected tracks across all GFP-CCR5 CHO cells (represented as a kernel density estimate (Leake, 2014) in Figure 5). This population of independent track-derived stoichiometries shows characteristic peaks, with the average nearest-neighbor interval between independent stoichiometry measurements revealing the typical periodicity inside oligomeric assemblies, if such periodicity exists (Wollman et al., 2017). For CCR5 in the absence of ligand, we find the periodicity to be  $2.3 \pm 0.5$  CCR5 molecules (Figure 5 inset), indicating a strong tendency for CCR5 molecules to occur in dimeric subunits inside CCR5 assemblies.

# Tracking of single molecules in PaTCH after addition of CCL5 indicates a broader spread of CCR5 foci stoichiometries

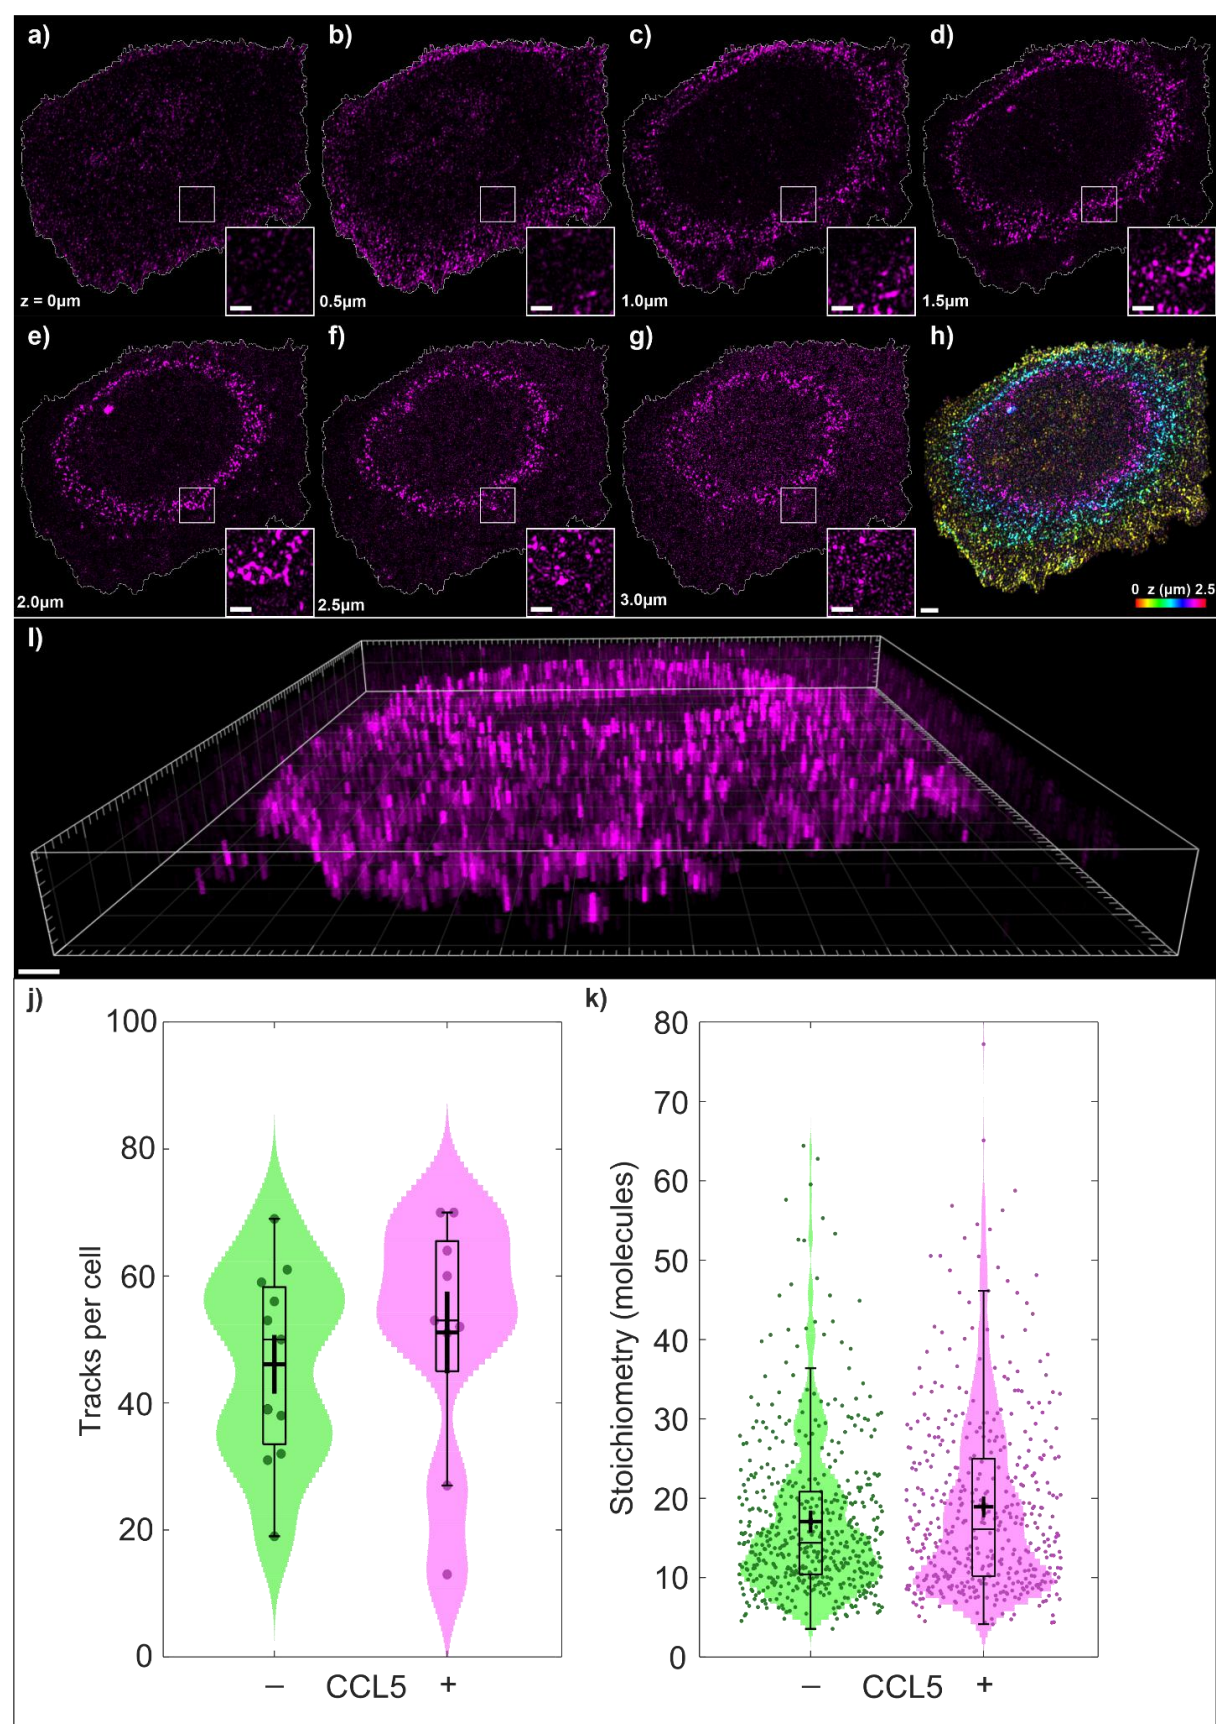

**Figure 6. Investigating the perturbation of CCR5 with agonist CCL5 using SIM and PaTCH microscopy.** a - g) Individual SIM images of a CCL5 perturbed CHO-CCR5 cell, optically sectioned from the basal membrane through to the apical membrane in 500nm increments, including cell boundary segmentation and magnified insets. h) Color depth projection of cell images shown in a -f). i) 3D reconstruction of cell images shown in a - g) (Scale bar 2  $\mu\text{m}$ , (magnified insets 1  $\mu\text{m}$ )). j) Numbers of GFP-CCR5 tracks detected per cell with and without CCL5 perturbation (N=9 or 11 cells, respectively). k) Violin distributions of the stoichiometry of GFP-CCR5 assemblies with and without CCL5 perturbation (N=460 or 507 tracks respectively). Bar, box and whisker denote median, interquartile range (IQR) and 2.5 $\times$  IQR respectively; cross: mean  $\pm$  sem.

This study was extended by applying the above methods to study CCR5 upon stimulation with the agonist CCL5. CHO-CCR5 cells treated for 5 minutes with CCL5 were imaged using SIM microscopy as shown in Figure 6 a-i). As in Figure 1, representation of these images included the correction of photobleaching, the exclusion of background fluorescence located outside of the cell and the inclusion of magnified insets of the CCR5 puncta. However, this cell is displayed using slightly differing contrast settings to enable optimal image presentation, despite small qualitative differences in brightness between cells (see Supplementary figure 1). Here we see a similar expression of CCR5 assemblies as small puncta throughout the cell membrane, with CCR5 spread evenly across the basal membrane and distributed uniformly within annular regions for imaging planes towards the apical membrane, as visualised in 3D (see Supplementary movie 2).

The SIM image data do not indicate any reduction in the overall number of puncta in perturbed versus non-perturbed cells, which may be expected from a process reported to induce internalisation. The PaTCH images provide quantitative detail which confirms that addition of CCL5 does not tend to change the average number of CCR5 assemblies, as the mean number of tracks we detect are not significantly different before and after CCL5 ( $46.1 \pm 4.8$  and  $51.1 \pm 6.8$  tracks per cell respectively) under the Brunner-Munzel (BM) test ( $n=18$ ,  $p=0.429$  | not significant at adjusted  $p<0.01$  level, NS). The mean stoichiometry of these assemblies lies in the vicinity of  $\sim 20$  molecules regardless of CCL5 addition (BM test:  $17.1 \pm 0.4$  and  $18.6 \pm 0.5$  molecules before and after CCL5 addition respectively,  $n=920$ ,  $p=0.145$  | NS). Taken together, these results suggest the total amount of CCR5 presented on the cell surface is approximately conserved under our experimental conditions.

However, CCL5 appears to affect large and small assemblies of CCR5 differently. We see a larger spread of stoichiometry of assemblies in perturbed cells (Figure 6 j-k) than can be accounted for by any difference in sampling variance. At the lower end, assemblies are more commonly comprised of approximately 8 CCR5 molecules, while at the higher end CCR5 contributes towards the growth of larger assemblies of greater than approximately 36 molecules. These two sub-groups are populated at the expense of intermediate assemblies near the mean stoichiometry. This is confirmed by the difference in the means of each before and after CCL5 addition (BM test at stoichiometry  $< 15$  molecules,  $n=436$ ,  $p=0.0085$  |\*; at stoichiometry  $> 15$  molecules,  $n=480$ ,  $p=0.0053$  |\*) despite almost identical numbers of assemblies in each group.

By studying CCL5 perturbation in GFP-CCR5 CHO cells using PaTCH microscopy, we determined an average periodicity in stoichiometry of  $2.2 \pm 0.3$  CCR5 molecules in the assemblies after perturbation. This is consistent with the result prior to ligand exposure (Figure 5 inset), and strongly indicates that the consistent dimeric composition of CCR5 within assemblies is unaffected by CCL5 (see Supplementary figure 2).

## Discussion

In this study we have investigated the membrane behaviour of CCR5 expressed in fixed model cell lines using both structured illumination microscopy (SIM) and a new mode of imaging we have developed called Partially TIRF coupled HILO (PaTCH) microscopy. Using this combination of advanced biophysical techniques we have been able to make observations into the clustering of membrane bound CCR5 as well as perform single-molecule investigations into the stoichiometry of these assemblies. Through the addition of perturbations employing the CCR5 agonist CCL5, we have been able to make preliminary observations into the ligand-dependent change in CCR5 behavior as proof-of-concept into the quantitative potential for new biological insight of this approach.

### SIM investigations of CCR5

Initial investigations into the distribution of CCR5 foci were carried out using an established line of GFP-CCR5 expressing CHO cells that have been utilised in preceding studies. Our study aimed to unveil the distribution of CCR5 through the use of super-resolution SIM microscopy, thereby allowing the precise localization of CCR5 for the analysis of its clustering behavior. The resulting 3D image data, which captured DyLight 650 labeled CCR5 assemblies from the basal to the apical membrane, revealed that CCR5 collects into small puncta throughout the entire plasma membrane. Through the localization of the intensity centroids of these puncta we were able to quantify the level of clustering in the CCR5 distribution using Ripley's H-function. Comparing these results with that of a randomly generated distribution of points, we found that CHO-CCR5 exhibits a clustered distribution with a modal clustering gradient of  $0.004 \pm 0.001$ . These results indicate that the puncta in which CCR5 appear to collect are located in a non-random spatial distribution over the plasma membrane, additional investigations are therefore needed into whether the location of CCR5 puncta is correlated to a biological process and whether this organisation serves specific cellular roles. Finally, analysis of Ripley's H values over a short range facilitated the determination of the nearest neighbor separation of CCR5 puncta with the mean distance being  $290 \pm 10$  nm, a result that further guides the characterisation of CCR5 expression.

### PaTCH microscopy investigations of CCR5

In order to provide information on the structure of these CCR5 assemblies we performed single-molecule investigations using PaTCH microscopy. For this purpose, a new line of cells was created that stably expressed CCR5 at a level suitable for single-molecule microscopy. As well as low expression, this cell model required



fluorescent labeling that could guarantee a ratio of one probe per CCR5 molecule for the purposes of molecular stoichiometry measurements. We therefore developed a line of CHO cells that stably express GFP-CCR5 and confirmed an appropriate expression level using flow cytometry. Utilising novel PaTCH microscopy to study this newly developed cell line, we were able to confirm the collection of CCR5 into small puncta and track the fluorescent intensity of these assemblies through time as they decayed due to photobleaching. Using this data and the method utilised in previous studies (Jin et al., 2021; Leake et al., 2006, 2008; Reyes-Lamothe et al., 2010; Syeda et al., 2019; Wollman et al., 2021, 2020b) we were able to determine the stoichiometries of individual CCR5 assemblies and form stoichiometry distributions for individual cell populations. We found that the distribution of CCR5 stoichiometries exhibits a significant range and can be characterised by the existence of periodic peaks in stoichiometry with an average interval of  $2.27 \pm 0.47$  molecules. The existence of this periodicity leads us to believe that CCR5 puncta on the basal membrane likely consist of homodimeric sub-units, a result that is supported in the literature with other groups reporting the existence of dimeric CCR5 (Jin et al., 2018; Martínez-Muñoz et al., 2018b). Recent studies have been conducted that similarly employ CCR5 fused with GFP expressed within CHO cells, providing validity to this method of reporting (Li et al., 2021), however these studies employ GFP coupled on the C-terminus of CCR5, as distinct from the N-terminus coupling in our study. Due to the existence of a PDZ binding domain on the C-terminus of CCR5, C-terminal coupling raises potential concerns regarding the downstream effect of PDZ masking on the behavior of CCR5 (Delhay et al., 2007; Hammad et al., 2010).

## Investigations of CCR5 after CCL5 interaction

Our investigations into the membrane behavior of CCR5 were extended through the perturbation of this model using the CCR5 agonist CCL5. This perturbation has been studied previously using bulk ensemble techniques which indicate progressive downmodulation of CCR5 (Signoret et al., 2005). Although our super-resolution SIM analysis did not detect a significant change in surface CCR5 following 5 minute of ligand stimulation, we noted that the spread of stoichiometry values acquired through PaTCH analysis increased following stimulation, despite a similar level of overall tracked assemblies. The increase in frequency of both small and large stoichiometries, coupled with a decreased incidence of intermediate stoichiometries, could be associated with the movement of CCR5 subunits from their basal membrane location towards sites of internalisation. Through findings from previous investigations (Mueller et al., 2002; Signoret et al., 2004), these sites are suspected to be clathrin-coated pits in which CCR5 is theorised to report for the purposes of internalisation and recycling. Although a promising preliminary finding in our proof-of-concept study here, to provide further evidence for this model would sensibly require further investigation using varying levels of ligand perturbation. Through acquiring a dataset with varying perturbation times, one would aim to establish further changes in the stoichiometry range as well as any downstream receptor internalisation. Further, investigations including the fluorescent labeling of clathrin would allow insight into the colocalization of CCR5 and clathrin-coated pits.

## Summary

Through the application of complementary biophysical techniques we have been able to perform super-resolved, single-molecule precise investigations of chemokine receptor CCR5 expressed in model cell lines. These investigations have provided hitherto unreported super-resolution images of CCR5 that allow us to reveal higher-order clustering of CCR5 subpopulations. Therefore, with the heterogeneity of GPCR subpopulations being linked with their signaling function (Martínez-Muñoz et al., 2018a), the ability of these techniques to determine independent sub-population structure and behaviour allows for the potential future production of results relevant to the fields of both immunology and immuno-oncology. By utilising the suitability of these microscopy techniques for the investigation of live-cell imaging, we will gain the ability to track receptors as they travel throughout the plasma membrane, thereby quantifying the dynamic characteristics of CCR5 assemblies. In addition, our investigations can be readily augmented to include additional perturbations of both CCL5 and other CCR5 agonists and antagonists, thereby allowing single-molecule studies into the effects of CCR5 targeted drugs, such as Maraviroc. Finally, although the study of CCR5 within model cell lines allows the measurement of CCR5-ligand characteristics in the absence of competing binding partners, future extensions of our study will aim to employ the use of primary onco-immunogenic cells for the investigation of endogenously expressed CCR5, thereby allowing the consideration of the effects of a natural plasma membrane environment on the behavior of CCR5.

## Limitations of the study

In this study, we employed fixed model cell lines transfected to express CCR5. Although these model cells allow us to study CCR5 and its agonist CCL5 in the absence of competing binding partners, the biological relevance of this model system is limited by the fact that these are not primary cells. By extending this study to the investigation of CCR5 expressed endogenously in primary onco-immunogenic cells, we can perform a rigorous study that accounts for the presence of other chemokine receptors and ligands. Further, through the extension of this study to investigate live cells, we can account for any effect induced through the process of fixation and allow for the determination of unhindered receptor dynamics. However, the extension of the methods discussed to the investigation of CCR5 within live tumor tissues introduces challenges associated with the imaging of optically thick samples, potentially comprising multiple cell layers, and the unavailability of stable receptor expression, thereby presenting the opportunity for further development of these light microscopy techniques. Additionally, this study sees the employment of fluorescent labels that require exposure to high levels of laser excitation intensity, thereby raising potential concerns regarding the permanent photobleaching of reporters and phototoxicity effects to the cells. Although photodamage issues are mitigated in our study through the use of fixed end-point based experiments, any future extension to live cells will require the consideration of potential cell damage if cells are to remain viable in culture. Finally, despite the successful use of GFP and DyLight 650 dye to determine single-molecule, super-resolved stoichiometry and spatial localization of CCR5 in our study,

these dye probes do possess room for improvement. Despite the remaining popularity of GFP, fluorescent proteins are comparable in size to CCR5 and have low fluorescence intensity when compared with modern organic dyes. Through the introduction of SNAP-tag® or similar technologies into our cell model we may improve the overall signal-to-noise ratio of future acquisitions using small bright organic dyes. Further, through the development of immunofluorescent labels that offer a dye to protein ratio of 1:1, we will be better equipped to perform measurements that report on the number of CCR5 molecules in distributions imaged using SIM.

## Acknowledgements

The authors thank members of the Leake and Signoret groups of the University of York for discussions and the Biosciences Technology Facility at York for assistance with flow cytometry. This work was funded by BBSRC (BB/T007222/1 and project 2279374) and EPSRC (EP/T002166/1). The authors also acknowledge funding from the UK's Department for Business, Energy and Industrial Strategy through the National Measurement System.

## Author contributions

Conceptualization: M.L, P.H, A.P-D, N.S

Project administration, Supervision and Funding Acquisition: M.L, N.S, M.S

Investigation, Methodology, Data curation, Analysis and Visualization: P.H, A.P-D, N.S, M.S

Software: A.P-D, P.H

Writing – original draft: P.H, A.P-D

Writing – review & editing: P.H, A.P-D, N.S, M.L, M.S

## Declaration of interests

The authors declare no competing interests.

## References

- Aldinucci, D., Borghese, C., Casagrande, N., 2020. The ccl5/ccr5 axis in cancer progression. *Cancers (Basel)* 12, 1765.  
<https://doi.org/10.3390/cancers12071765>
- Aldinucci, D., Borghese, C., Casagrande, N., 2019. Formation of the Immunosuppressive Microenvironment of Classic Hodgkin Lymphoma and

- Therapeutic Approaches to Counter It. *International Journal of Molecular Sciences* 2019, 20, 2416. <https://doi.org/10.3390/IJMS20102416>
- Aldinucci, D., Casagrande, N., 2018. Inhibition of the CCL5/CCR5 Axis against the Progression of Gastric Cancer. *International Journal of Molecular Sciences* 2018, 19, 1477. <https://doi.org/10.3390/IJMS19051477>
- Aldinucci, D., Colombatti, A., 2014. The inflammatory chemokine CCL5 and cancer progression. *Mediators of Inflammation* 2014. <https://doi.org/10.1155/2014/292376>
- Aldinucci, D., Lorenzon, D., Cattaruzza, L., Pinto, A., Gloghini, A., Carbone, A., Colombatti, A., 2008. Expression of CCR5 receptors on Reed–Sternberg cells and Hodgkin lymphoma cell lines: Involvement of CCL5/Rantes in tumor cell growth and microenvironmental interactions. *International Journal of Cancer* 122, 769–776. <https://doi.org/10.1002/ijc.23119>
- Berro, R., Klasse, P.J., Lascano, D., Flegler, A., Nagashima, K.A., Sanders, R.W., Sakmar, T.P., Hope, T.J., Moore, J.P., 2011. Multiple CCR5 Conformations on the Cell Surface Are Used Differentially by Human Immunodeficiency Viruses Resistant or Sensitive to CCR5 Inhibitors. *Journal of Virology* 85, 8227–8240. <https://doi.org/10.1128/jvi.00767-11>
- Chang, L.Y., Lin, Y.C., Mahalingam, J., Huang, C.T., Chen, T.W., Kang, C.W., Peng, H.M., Chu, Y.Y., Chiang, J.M., Dutta, A., Day, Y.J., Chen, T.C., Yeh, C.T., Lin, C.Y., 2012. Tumor-derived chemokine CCL5 enhances TGF- $\beta$ -mediated killing of CD8 + T cells in colon cancer by T-regulatory cells. *Cancer Research* 72, 1092–1102. <https://doi.org/10.1158/0008-5472.can-11-2493>
- Colin, P., Bénureau, Y., Staropoli, I., Wang, Y., Gonzalez, N., Alcamí, J., Hartley, O., Brelot, A., Arenzana-Seisdedos, F., Lagane, B., 2013. HIV-1 exploits CCR5 conformational heterogeneity to escape inhibition by chemokines. *Proc Natl Acad Sci U S A* 110, 9475–9480. <https://doi.org/10.1073/PNAS.1222205110>
- Colin, P., Zhou, Z., Staropoli, I., Garcia-Perez, J., Gasser, R., Armani-Tourret, M., Benureau, Y., Gonzalez, N., Jin, J., Connell, B.J., Raymond, S., Delobel, P., Izopet, J., Lortat-Jacob, H., Alcamí, J., Arenzana-Seisdedos, F., Brelot, A., Lagane, B., 2018. CCR5 structural plasticity shapes HIV-1 phenotypic properties. *PLOS Pathogens* 14, e1007432. <https://doi.org/10.1371/JOURNAL.PPAT.1007432>
- Delalez, N.J., Wadhams, G.H., Rosser, G., Xue, Q., Brown, M.T., Dobbie, I.M., Berry, R.M., Leake, M.C., Armitage, J.P., 2010. Signal-dependent turnover of the bacterial flagellar switch protein FliM. *Proceedings of the National Academy of Sciences* 107, 11347–11351. <https://doi.org/10.1073/pnas.1000284107>
- Delhaye, M., Gravot, A., Ayinde, D., Niedergang, F., Alizon, M., Brelot, A., 2007. Identification of a Postendocytic Sorting Sequence in CCR5. *Molecular Pharmacology* 72, 1497–1507. <https://doi.org/10.1124/MOL.107.038422>



- Dresser, L., Hunter, P., Yendybayeva, F., Hargreaves, A.L., Howard, J.A.L., Evans, G.J.O., Leake, M.C., Quinn, S.D., 2021. Amyloid- $\beta$  oligomerization monitored by single-molecule stepwise photobleaching. *Methods* 193, 80–95. <https://doi.org/10.1016/J.YMETH.2020.06.007>
- Fox, J.M., Kasproicz, R., Hartley, O., Signoret, N., 2015. CCR5 susceptibility to ligand-mediated down-modulation differs between human T lymphocytes and myeloid cells. *Journal of Leukocyte Biology* 98, 59–71. <https://doi.org/10.1189/JLB.2A0414-193RR>
- Gustafsson, M.G.L., Shao, L., Carlton, P.M., Wang, C.J.R., Golubovskaya, I.N., Cande, W.Z., Agard, D.A., Sedat, J.W., 2008. Three-dimensional resolution doubling in wide-field fluorescence microscopy by structured illumination. *Biophys J* 94, 4957–4970. <https://doi.org/10.1529/BIOPHYSJ.107.120345>
- Haag, G.M., Halama, N., Springfield, C., Grün, B., Apostolidis, L., Zschaebitz, S., Dietrich, M., Berger, A.-K., Weber, T.F., Zoernig, I., Waberer, L., Mueller, D.W., Al-Batran, S.-E., Jaeger, D., 2020. Combined PD-1 inhibition (Pembrolizumab) and CCR5 inhibition (Maraviroc) for the treatment of refractory microsatellite stable (MSS) metastatic colorectal cancer (mCRC): First results of the PICCASSO phase I trial. [https://doi.org/10.1200/JCO.2020.38.15\\_suppl.3010](https://doi.org/10.1200/JCO.2020.38.15_suppl.3010)
- Hammad, M.M., Kuang, Y.Q., Yan, R., Allen, H., Dupre, D.J., 2010. Na<sup>+</sup>/H<sup>+</sup> Exchanger Regulatory Factor-1 Is Involved in Chemokine Receptor Homodimer CCR5 Internalization and Signal Transduction but Does Not Affect CXCR4 Homodimer or CXCR4-CCR5 Heterodimer. *Journal of Biological Chemistry* 285, 34653–34664. <https://doi.org/10.1074/JBC.M110.106591>
- Jiao, X., Nawab, O., Patel, T., Kossenkova, A. v., Halama, N., Jaeger, D., Pestell, R.G., 2019. Recent advances targeting CCR5 for cancer and its role in immunoncology. *Cancer Research* 79, 4801–4807. <https://doi.org/10.1158/0008-5472.CAN-19-1167>
- Jin, J., Momboisse, F., Boncompain, G., Koensgen, F., Zhou, Z., Cordeiro, N., Arenzana-Seisdedos, F., Perez, F., Lagane, B., Kellenberger, E., Brelot, A., 2018. CCR5 adopts three homodimeric conformations that control cell surface delivery. *Science Signaling* 11, 2869. <https://doi.org/10.1126/scisignal.aal2869>
- Jin, X., Lee, J.E., Schaefer, C., Luo, X., Wollman, A.J.M., Payne-Dwyer, A.L., Tian, T., Zhang, X., Chen, X., Li, Y., McLeish, T.C.B., Leake, M.C., Bai, F., 2021. Membraneless organelles formed by liquid-liquid phase separation increase bacterial fitness. *Science Advances* 7. <https://doi.org/10.1126/sciadv.abh2929>
- Joseph, M.D., Bort, E.T., Grose, R.P., McCormick, P.J., Simoncelli, S., 2021. Quantitative Super-Resolution Imaging for the Analysis of GPCR Oligomerization. *Biomolecules* 2021, 11, 1503. <https://doi.org/10.3390/BIOM11101503>
- Kasai, R.S., Kusumi, A., 2014. Single-molecule imaging revealed dynamic GPCR dimerization. *Current Opinion in Cell Biology* 27, 78–86. <https://doi.org/10.1016/J.CEB.2013.11.008>

- Kasproicz, R., Rand, E., O'Toole, P.J., Signore, N., 2018. A correlative and quantitative imaging approach enabling characterization of primary cell-cell communication: Case of human CD4+ T cell-macrophage immunological synapses. *Scientific Reports* 2018 8:1 8, 1–17. <https://doi.org/10.1038/s41598-018-26172-3>
- Kiskowski, M.A., Hancock, J.F., Kenworthy, A.K., 2009. On the use of Ripley's K-function and its derivatives to analyze domain size. *Biophys J* 97, 1095–1103. <https://doi.org/10.1016/J.BPJ.2009.05.039>
- Leake, M.C., 2014. Analytical tools for single-molecule fluorescence imaging in cellulo. *Phys. Chem. Chem. Phys.* 16, 12635–12647. <https://doi.org/10.1039/C4CP00219A>
- Leake, M.C., Chandler, J.H., Wadhams, G.H., Bai, F., Berry, R.M., Armitage, J.P., 2006. Stoichiometry and turnover in single, functioning membrane protein complexes. *Nature* 443, 355–358. <https://doi.org/10.1038/nature05135>
- Leake, M.C., Greene, N.P., Godun, R.M., Granjon, T., Buchanan, G., Chen, S., Berry, R.M., Palmer, T., Berks, B.C., 2008. Variable stoichiometry of the TatA component of the twin-arginine protein transport system observed by *in vivo* single-molecule imaging. *Proceedings of the National Academy of Sciences* 105, 15376–15381. <https://doi.org/10.1073/pnas.0806338105>
- Lenn, T., Leake, M.C., 2012. Experimental approaches for addressing fundamental biological questions in living, functioning cells with single molecule precision. *Open Biology* 2. <https://doi.org/10.1098/RSOB.120090>
- Li, J., Ding, Y., Liu, H., He, H., Yu, D., Wang, Xiaoqiang, Wang, Xiaojuan, Yu, X., Ge, B., Huang, F., 2021. Oligomerization-Enhanced Receptor-Ligand Binding Revealed by Dual-Color Simultaneous Tracking on Living Cell Membranes. *Journal of Physical Chemistry Letters* 12, 8164–8169. <https://doi.org/10.1021/acs.jpcllett.1c01844>
- Mack, M., Luckow, B., Nelson, P.J., Cihak, J., Simmons, G., Clapham, P.R., Signore, N., Marsh, M., Stangassinger, M., Borlat, F., Wells, T.N.C., Schlöndorff, D., Proudfoot, A.E.I., 1998. Aminoxy-pentane-RANTES Induces CCR5 Internalization but Inhibits Recycling: A Novel Inhibitory Mechanism of HIV Infectivity. *Journal of Experimental Medicine* 187, 1215–1224. <https://doi.org/10.1084/JEM.187.8.1215>
- Martínez-Muñoz, L., Rodríguez-Frade, J.M., Barroso, R., Sorzano, C.Ó.S., Torreño-Pina, J.A., Santiago, C.A., Manzo, C., Lucas, P., García-Cuesta, E.M., Gutierrez, E., Barrio, L., Vargas, J., Cascio, G., Carrasco, Y.R., Sánchez-Madrid, F., García-Parajo, M.F., Mellado, M., 2018a. Separating Actin-Dependent Chemokine Receptor Nanoclustering from Dimerization Indicates a Role for Clustering in CXCR4 Signaling and Function. *Molecular Cell* 70, 106–119.e10. <https://doi.org/10.1016/J.MOLCEL.2018.02.034>
- Martínez-Muñoz, L., Villares, R., Rodríguez-Fernández, J.L., Rodríguez-Frade, J.M., Mellado, M., 2018b. Remodeling our concept of chemokine receptor function:

- From monomers to oligomers. *Journal of Leukocyte Biology* 104, 323–331.  
<https://doi.org/10.1002/JLB.2MR1217-503R>
- Miao, M., de Clercq, E., Li, G., 2020. Clinical significance of chemokine receptor antagonists. *Expert opinion on drug metabolism & toxicology* 16, 11–30.  
<https://doi.org/10.1080/17425255.2020.1711884>
- Miller, H., Zhou, Z., Wollman, A.J.M., Leake, M.C., 2015. Superresolution imaging of single DNA molecules using stochastic photoblinking of minor groove and intercalating dyes. *Methods* 88, 81–88.  
<https://doi.org/10.1016/j.ymeth.2015.01.010>
- Mueller, A., Kelly, E., Strange, P.G., 2002. Pathways for internalization and recycling of the chemokine receptor CCR5. *Blood* 99, 785–791.  
<https://doi.org/10.1182/BLOOD.V99.3.785>
- O'Holleran, K., Shaw, M., 2014. Optimized approaches for optical sectioning and resolution enhancement in 2D structured illumination microscopy. *Biomedical Optics Express*, 5, 2580-2590. <https://doi.org/10.1364/BOE.5.002580>
- Pageon, S. v., Nicovich, P.R., Mollazade, M., Tabarin, T., Gaus, K., 2016. Clus-DoC: a combined cluster detection and colocalization analysis for single-molecule localization microscopy data. *Molecular Biology of the Cell* 27, 3627–3636.  
<https://doi.org/10.1091/mbc.e16-07-0478>
- Payne-Dwyer, A., Leake, M., 2021. Single-molecular quantification of flowering control proteins within nuclear condensates in live whole *Arabidopsis* root.  
<https://doi.org/10.48550/arXiv.2108.13743>
- Plank, M., Wadhams, G.H., Leake, M.C., 2009. Millisecond timescale slimfield imaging and automated quantification of single fluorescent protein molecules for use in probing complex biological processes. *Integrative Biology* 1, 602.  
<https://doi.org/10.1039/b907837a>
- Reyes-Lamothe, R., Sherratt, D.J., Leake, M.C., 2010. Stoichiometry and Architecture of Active DNA Replication Machinery in *Escherichia coli*. *Science* (1979) 328, 498–501. <https://doi.org/10.1126/science.1185757>
- Shaw, M., Zajiczek, L., O'Holleran, K., 2015. High speed structured illumination microscopy in optically thick samples. *Methods* 88, 11–19.  
<https://doi.org/10.1016/J.YMETH.2015.03.020>
- Signoret, N., Christophe, T., Oppermann, M., Marsh, M., 2004. pH-Independent Endocytic Cycling of the Chemokine Receptor CCR5. *Traffic* 5, 529–543.  
<https://doi.org/10.1111/J.1600-0854.2004.00200.X>
- Signoret, N., Hewlett, L., Wavre, S., Pelchen-Matthews, A., Oppermann, M., Marsh, M., 2005. Agonist-induced endocytosis of CC chemokine receptor 5 is clathrin dependent. *Molecular Biology of the Cell* 16, 902–917.  
<https://doi.org/10.1091/MBC.E04-08-0687>

- Signoret, N., Pelchen-Matthews, A., Mack, M., Proudfoot, A.E.I., Marsh, M., 2000. Endocytosis and Recycling of the HIV Coreceptor Ccr5. *Journal of Cell Biology* 151, 1281–1294. <https://doi.org/10.1083/jcb.151.6.1281>
- Syeda, A.H., Wollman, A.J.M., Hargreaves, A.L., Howard, J.A.L., Bruning, J.G., McGlynn, P., Leake, M.C., 2019. Single-molecule live cell imaging of Rep reveals the dynamic interplay between an accessory replicative helicase and the replisome. *Nucleic Acids Research* 47, 6287. <https://doi.org/10.1093/NAR/GKZ298>
- Tan, M.C.B., Goedegebuure, P.S., Belt, B.A., Flaherty, B., Sankpal, N., Gillanders, W.E., Eberlein, T.J., Hsieh, C.-S., Linehan, D.C., 2009. Disruption of CCR5-Dependent Homing of Regulatory T Cells Inhibits Tumor Growth in a Murine Model of Pancreatic Cancer. *The Journal of Immunology* 182, 1746–1755. <https://doi.org/10.4049/JIMMUNOL.182.3.1746>
- Tian, H., Furstenberg, A., Huber, T., 2017. Labeling and single-molecule methods to monitor G protein-coupled receptor dynamics. *Chemical Reviews* 117, 186–245. <https://doi.org/10.1021/ACS.CHEMREV.6B00084>
- Tokunaga, M., Imamoto, N., Sakata-Sogawa, K., 2008. Highly inclined thin illumination enables clear single-molecule imaging in cells. *Nature Methods* 2008 5:2 5, 159–161. <https://doi.org/10.1038/nmeth1171>
- Upadhyaya, C., Jiao, X., Ashton, A., Patel, K., Kossenkova, A. v., Pestell, R.G., 2020. The G protein coupled receptor CCR5 in cancer. *Advances in Cancer Research* 145, 29–47. <https://doi.org/10.1016/bs.acr.2019.11.001>
- Vaday, G.G., Peehl, D.M., Kadam, P.A., Lawrence, D.M., 2006. Expression of CCL5 (RANTES) and CCR5 in prostate cancer. *Prostate* 66, 124–134. <https://doi.org/10.1002/PROS.20306>
- Weichseldorfer, M., Tagaya, Y., Reitz, M., DeVico, A.L., Latinovic, O.S., 2022. Identifying CCR5 coreceptor populations permissive for HIV-1 entry and productive infection: implications for in vivo studies. *Journal of Translational Medicine* 20, 1–12. <https://doi.org/10.1186/s12967-022-03243-8>
- Wollman, A., Fournier, C., Llorente-Garcia, I., Harriman, O., Payne-Dwyer, A., Shashkova, S., Zhou, P., Liu, T.-C., Ouaret, D., Wilding, J., Kusumi, A., Bodmer, W., Leake, M., 2021. Critical roles for EGFR and EGFR-HER2 clusters in EGF binding of SW620 human carcinoma cells. *Journal of The Royal Society Interface*. <https://dx.doi.org/10.1098/rsif.2022.0088>
- Wollman, A.J.M., Hedlund, E.G., Shashkova, S., Leake, M.C., 2020a. Towards mapping the 3D genome through high speed single-molecule tracking of functional transcription factors in single living cells. *Methods* 170, 82–89. <https://doi.org/10.1016/J.YMETH.2019.06.021>
- Wollman, A.J.M., Leake, M.C., 2015. Millisecond single-molecule localization microscopy combined with convolution analysis and automated image segmentation to determine protein concentrations in complexly structured,



functional cells, one cell at a time. Faraday Discussions 184, 401–424.  
<https://doi.org/10.1039/C5FD00077G>

Wollman, A.J.M., Muchová, K., Chromiková, Z., Wilkinson, A.J., Barák, I., Leake, M.C., 2020b. Single-molecule optical microscopy of protein dynamics and computational analysis of images to determine cell structure development in differentiating *Bacillus subtilis*. *Comput Struct Biotechnol J* 18, 1474–1486.  
<https://doi.org/10.1016/J.CSBJ.2020.06.005>

Wollman, A.J.M., Shashkova, S., Hedlund, E.G., Friemann, R., Hohmann, S., Leake, M.C., 2017. Transcription factor clusters regulate genes in eukaryotic cells. *Elife* 6. <https://doi.org/10.7554/ELIFE.27451>

Yuan, Y., Jacobs, C.A., Llorente Garcia, I., Pereira, P.M., Lawrence, S.P., Laine, R.F., Marsh, M., Henriques, R., 2021. Single-Molecule Super-Resolution Imaging of T-Cell Plasma Membrane CD4 Redistribution upon HIV-1 Binding. *Viruses* 13. <https://doi.org/10.3390/V13010142>

## **Methods**

### **Lead contact**

Further information and requests for resources and reagents should be directed to the lead contact, Mark C. Leake ([mark.leake@york.ac.uk](mailto:mark.leake@york.ac.uk)).

### **Materials availability**

Plasmid and cell lines generated in this study will be available upon request with a material transfer agreement (MTA).

### **Data and code availability**

All original code is publicly available and has been deposited at <https://github.com/alex-paynedwyer/single-molecule-tools-alpd>. Any additional information required to reanalyse the data reported in this paper is available from the lead contact upon request.

### **Experimental model and subject details**

#### **Cell lines**

Female Chinese hamster ovary cells (CHO-K1) and DHFR-deficient CHO cells stably transfected with human CCR5 (CHO-CCR5) (Signoret et al., 2005) were verified mycoplasma-free and maintained in complete (+ 10% FCS with 4mM L-glutamine, 100U/ml penicillin and 0.1mg/ml streptomycin) Dulbecco's Modified Eagle Medium (DMEM) or MEM-alpha medium, respectively.

# **Method details**

## **Materials**

Tissue culture reagents and plastics were purchased from Invitrogen Life Technologies, (Paisley, UK), and chemicals from Sigma-Aldrich Company Ltd (Poole, UK), unless otherwise indicated. CCL5 (RANTES) was purchased from PeproTech EC Ltd.

## **Transfection and generation of new cell line:**

CHO-GFP-CCR5 cell lines were generated by transfecting CHO-K1 with a pCDNA3.1 Hygro-GFP-CCR5 construct using the TransIT-X2 transfection reagent from Mirus (MIR 6003). CCR5 expression was maintained by culturing cells in the presence of 400 µg/ml hygromycin and GFP-CCR5 expressing cells were isolated for single-cell cloning through the process of serial dilution cloning. In this process, single GFP-CCR5 positive cells were seeded individually in a 96-well plate and expanded by continuous culture in the presence of hygromycin. Selection of specific populations based on their clonality and relatively low GFP signal intensity was aided through the characterisation of GFP expression using Flow cytometry (CytoFLEX LX, Beckman Coulter) against non-transfected CHO-K1 controls, as shown in Figure 3. Analysis of Flow cytometry results was performed using CytExpert (Beckman Coulter).

## **GFP-CCR5 CHO cell preparation for PaTCH microscopy:**

GFP-CCR5 CHO cells from an 80% confluent well of a 6-well plate were detached in PBS 10mM EDTA and seeded on 1.5 mm thick round coverslips at a dilution of 1:10 3 days prior to mounting. Cell samples were fixed with a solution of 3% formaldehyde in Phosphate Buffer Saline (PBS) for 20 mins at room temperature, before being extensively washed in PBS. Coverslips were mounted in Mowiol, as previously described in preceding studies (Kasprowicz et al., 2018).

## **Immunofluorescent staining of CHO-CCR5 cells for SIM:**

CHO-CCR5 cells from an 80% confluent 10cm dish detached in PBS-10mM EDTA were seeded on 1.5 mm thick round coverslips two days prior to mounting. The culture medium was then replaced with Binding Medium (BM: RPMI 1640 without carbonate or glutamine, 0.2% (w/v) BSA, 10mM HEPES adjusted to pH 7). For chemokine treatment, 100nM CCL5 was added to the BM before incubating coverslips at 37°C for 5 min. Incubation was stopped by fixing samples as described above. For staining, free aldehyde groups were quenched with a 50mM NH<sub>4</sub>CL solution for 20 mins before saturation of non-specific binding in PBS with 1% FCS (PBS/FCS). Cells on coverslips were labeled intact with DyLight 650-MC-5 (2 µg/ml) in PBS/FCS for an hour before washing in PBS and mounting samples in Mowiol, as described above. MC-5 is an anti-human CCR5 mAb grown from a hybridoma and purified by Dr. Matthias Mack (Signoret et al., 2000) MC-5 was fluorescently labeled using DyLight 650 NHS ester coupling kit (Thermo Fisher) with a dye:protein coupling ratio of 1.57:1.

## PaTCH imaging

The Slimfield microscope (without alteration for PaTCH acquisition) is based on a custom-built epifluorescence/TIRF optical pathway previously described (Payne-Dwyer and Leake, 2021; Plank et al., 2009; Syeda et al., 2019). An optimised angle of excitation beam delivery distinguishes PaTCH imaging from the traditionally used TIRF and HILO microscope settings, thereby facilitating the imaging of transmembrane proteins in mammalian cells (Wollman et al., 2021). In this study the angle of incidence of the excitation beam was set to a sub-critical angle of  $55^\circ$  by translation of a telescope lens, as calibrated using the lateral displacement of the beam downstream of the focal plane (Dresser et al., 2021). At this angle, we estimated that roughly 30% of the incident light is coupled into a reflected TIRF mode, with the associated enhancement of the excitation field at the surface. The remaining light couples into transmitted HILO modes, which extend the excitation field into regions of the basal membrane not directly contacting the coverslip, but not the interior of the cell.

The 488 nm wavelength laser (Coherent OBIS LX) was spatially filtered to the TEM<sub>00</sub> mode and delivered by an oil-immersion objective lens (Nikon ApoTIRF, 100x, NA 1.49). The illumination covered an area c. 60  $\mu\text{m}$  wide (diameter at  $1/e^2$  peak intensity) in the sample plane as characterised using a sample of immobilised standard fluorescent microbeads (Promega). The source power was 30 mW, corresponding to an excitation intensity of approximately 0.5 kW/cm<sup>2</sup> at the sample.

A single image sequence was captured for each field of view in OME TIFF format using a Prime 95b camera (Teledyne Photometrics). The exposure time was 10 ms per frame, during which the laser was digitally triggered, and a total framerate of 77 fps over 1000 - 3000 frames at 53 nm/pixel magnification. The estimated lateral resolution is 180 nm, while the localization precision of each focus is approximately 40 nm (Lenn and Leake, 2012). The detection performance was characterised using *in vitro* recombinant GFP immobilised to a coverslip (Delalez et al., 2010; Leake et al., 2006; Wollman et al., 2020a).

## Single particle tracking

The custom software suite, ADEMScode (MATLAB, MathWorks) (Miller et al., 2015) was employed to detect local maxima inside circles of 8-pixel radius (foci), above background (averaged over 17 pixel squares) in each frame of a given image sequence. These foci were then thresholded by signal-to-noise ratio, fitted with a Gaussian intensity mask to establish the super-resolved centroid, width and integrated intensity (background subtracted sum of pixel values). The foci were then linked into tracks based on their persistent overlap (75-100%) and intensity ratio (50-200%) across adjacent frames. A representative example of these super-resolved tracks overlaid on the parent PaTCH image is shown in Supplementary figure 3." The initial intensity of each track was linearly extrapolated back across the first five frames to an initial time free of photobleaching. The stoichiometry of each track was obtained from this initial intensity, by first determining the characteristic integrated intensity of a focus containing a single GFP probe (Wollman and Leake, 2015), using stepwise photobleaching until the detection of only consistent, single-molecule focus. This

global value was used to normalize the integrated intensity of each track to a number of GFP molecules per track, which, given the 1:1 labeling of the protein of interest, was equated with the CCR5 stoichiometry. The collated stoichiometry of all tracks were represented as kernel density estimates with kernel width of 0.7 molecules, corresponding to the rms detection sensitivity of the integrated intensity of a single GFP molecule in a focus (Figure 5). The periodicity was calculated by sorting the stoichiometries of a population of tracks and taking the nearest-neighbour differences (Wollman et al., 2017). These intervals were themselves then plotted as a kernel density estimate with kernel width of 0.7 molecules. The periodicity was quoted as the modal peak in this distribution (Figure 5 inset), with error estimated as 0.7 molecules, multiplied by the square root of the ratio of the mean stoichiometry and the number of extrapolation points, divided by the number of tracks under the main peak.

### SIM imaging

Super-resolution imaging was performed using a custom SIM system built around an inverted widefield epifluorescence microscope (IX71, Olympus) as described in (O'Holleran and Shaw, 2014; Shaw et al., 2015). Illumination patterns were generated by projecting the spatially filtered image of a binary phase grating, displayed on a liquid-crystal-on-silicon spatial light modulator (SLM) (SXGA-3DM, Forth Dimension Displays), into the sample. Images were recorded using a scientific CMOS camera (Flash 4.0, Hamamatsu Photonics), with the global exposure period of the camera's rolling shutter synchronised to the SLM. Each super-resolution image was reconstructed from nine raw images captured under illumination of the sample with a series of sinusoidal excitation patterns (three pattern orientations separated by  $120^\circ$  and pattern phases separated by  $2\pi/3$  per orientation). High pass filtering was applied to suppress out-of-focus information close to the centre of each separated Fourier space information passband (O'Holleran and Shaw, 2014) before passbands were shifted and combined as described in (Gustafsson et al., 2008). Images of DyLight 650 labeled CHO-CCR5 were acquired using a quad band fluorescence filter cube (TRF89901-EM, Chroma) and a 60x/1.3 silicone immersion objective lens (UPLSAPO, Olympus) with excitation at 638 nm using a diode laser (Luxx, Omicron), with an effective lateral (Abbe) resolution of approximately 170 nm. Post reconstruction, images captured at different focal offsets were corrected for photobleaching by scaling using an exponential decay curve measured by repeated imaging of the same region of a cell under identical conditions.

### Clustering analysis

Images of CHO-CCR5 labeled with DyLight 650 obtained using SIM underwent cell boundary segmentation to remove extracellular foci. Images then underwent binarization using a combination (in parallel, followed by an AND operation) of global Otsu thresholding and local Otsu thresholding with a rolling ball radius of 25 pixels. The binary images revealed objects corresponding to local enrichment of CCR5. The number of objects, and the characteristic properties of each object, including area, centroid and circularity were determined using the *Analyze Objects* function in ImageJ/Fiji. The number density of objects (Figure 2 d) was calculated using a 2D



kernel density estimate of the object centroid coordinates, with kernel width of the widefield lateral resolution, ~180 nm.

Centroid coordinates of foci were analysed using ClusDoc software (Pageon et al., 2016). The relative clustering or dispersal of objects was assessed for each individual cell using the Ripley H function. The Ripley H function is equal to the Ripley L function less the radius,  $H(r)=L(r)-r$ , where  $L(r)$  is the radius of a circle in which the experimentally counted points inside *would otherwise be* uniformly distributed (Kiskowski et al., 2009). Thus, Ripley H is a measure of the deviation from uniform distribution,  $H(r)=0$ , with positive deviations corresponding to ‘attractive’ clustering of objects. The clustering results were validated against simulated negative and positive controls, which were point clouds generated respectively from random 2D coordinates or points on a square lattice with rms noise of half the lattice spacing (MATLAB). Nearest neighbour distances were calculated using the minimum value of  $H(r)$  associated with the initial negative  $H(r)$  values, values were averaged over all cells to provide a mean value  $\pm$  standard error of the mean. Clustering gradients were determined as the peak of a kernel density estimate of gradient values calculated pairwise between adjacent  $H(r)$ , with a kernel width of 0.001.

### **Quantification and statistical analysis**

MATLAB was used for statistical tests as reported in the Results section. To account for multiple comparisons (across  $\leq 5$  tests per sample: intensity/stoichiometry, periodicity and cluster density), we used a conservative Bonferroni-adjusted significance level of  $\alpha = 0.05/5 = 0.01$ . Nonparametric statistical tests were used to test for significance, chiefly the Brunner-Menzel test with exact values of  $N$  and  $p$  reported.  $N$  represents in each case either the number of foci or the number of cells.

As the underlying distributions and variances were unknown *a priori*, a target sample size of 24 was estimated based on a minimum detection level of 1 s.d. at 80% power under normal statistics. Cell cultures were assigned randomly for ligand +/- groups. Of 27 total acquisitions, 26 were included based on sufficient quality of the initial microscope focus.

## Supplementary Information

### Super-resolved imaging deciphers ligand dependent membrane behaviour of the onco-immunogenic CCR5 receptor.

Patrick Hunter<sup>1</sup>, Alex L. Payne-Dwyer<sup>1</sup>, Michael Shaw<sup>2,3</sup>, Nathalie Signoret<sup>4</sup> and Mark C. Leake<sup>1\*</sup>

<sup>1</sup>Departments of Physics and Biology, University of York, YO10 5DD, UK

<sup>2</sup>National Physical Laboratory, Hampton Road, Teddington, Middlesex, TW11 0LW

<sup>3</sup>Department of Computer Science, University College London, London, WC1E 6EA, UK

<sup>4</sup>Hull York Medical School, University of York, YO10 5DD, UK

\*Correspondence: [mark.leake@york.ac.uk](mailto:mark.leake@york.ac.uk)

## Supplementary movie legends

**Supplementary movie 1. A 3D movie of a CHO-CCR5 cell shows distinct puncta throughout the membrane.** 3D reconstruction of 7 Individual SIM images of a CHO-CCR5 cell labeled with DyLight 650, as shown in Figure 1 a-g). (Scale bar 2 $\mu$ m).

**Supplementary movie 2. A 3D movie of a CHO-CCR5 cell after ligation shows retention of distinct puncta throughout cell.** 3D reconstruction of 7 Individual SIM images of a CHO-CCR5 cell labeled with DyLight 650 and perturbed with CCL5, as shown in Figure 6 a-g). (Scale bar 2 $\mu$ m).

# Supplementary figures

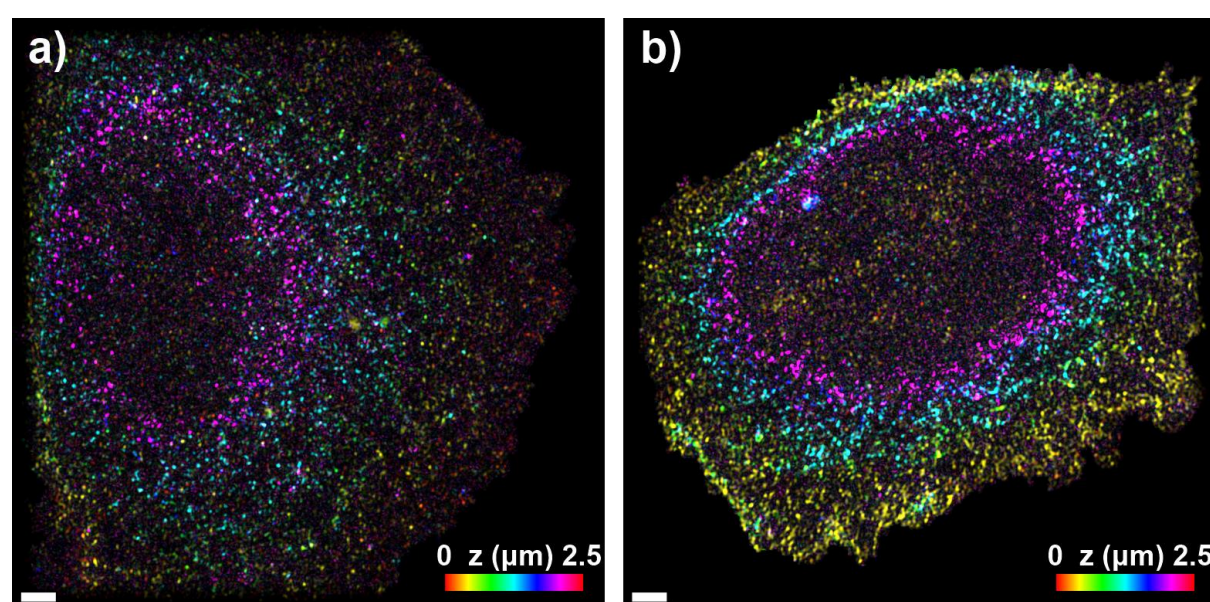

**Supplementary figure 1. Comparison of cellular imaging demonstrates slight variation in brightness.** Color depth projection of cell images shown in a) Figure 1 h) and b) Figure 6 h). Comparison of which at identical contrast settings demonstrates the slight variation in brightness that can exist between cells. This change in brightness can stem from many factors, including the natural variance of expression in this non-clonal cell model.

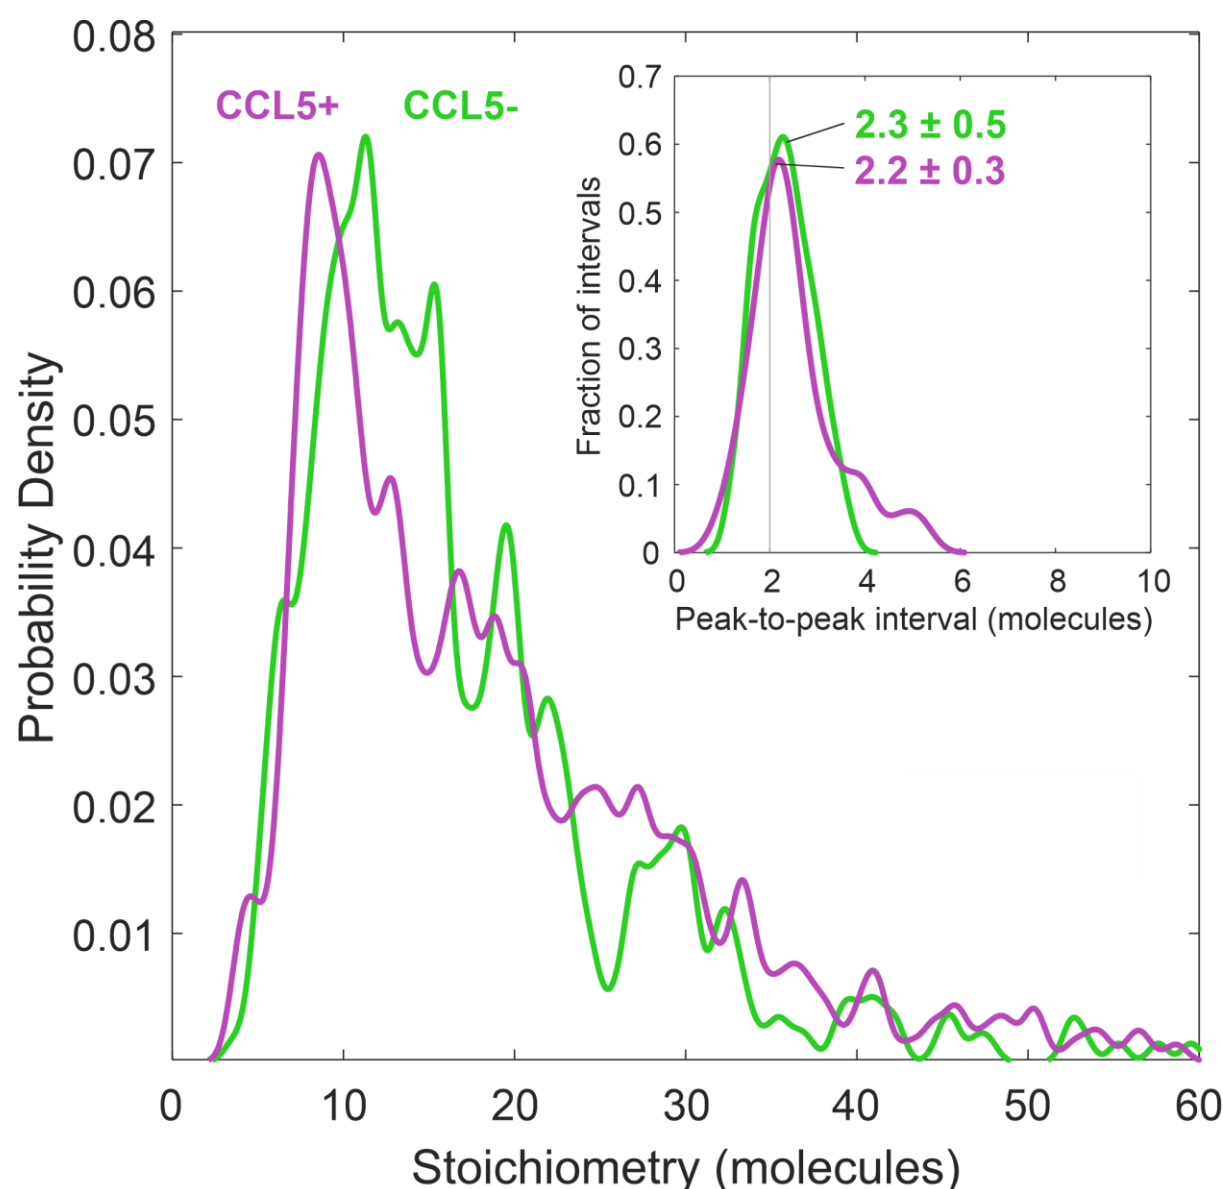

**Supplementary figure 2. Periodic stoichiometry distribution indicates that CCR5 assemblies comprise dimeric subunits both before and after CCL5 exposure.** Kernel density estimates of stoichiometry and (inset) periodic stoichiometry intervals of GFP-CCR5 associated foci before (green) and after (magenta) the addition of CCL5 (N=460 or 507 tracks respectively) detected by PaTCH microscopy in GFP-CCR5 transfected CHO cells (N=9 and 11 cells respectively). Kernel width = 0.6 molecules. (BM test for difference in periodicity,  $p=0.479$  | NS).



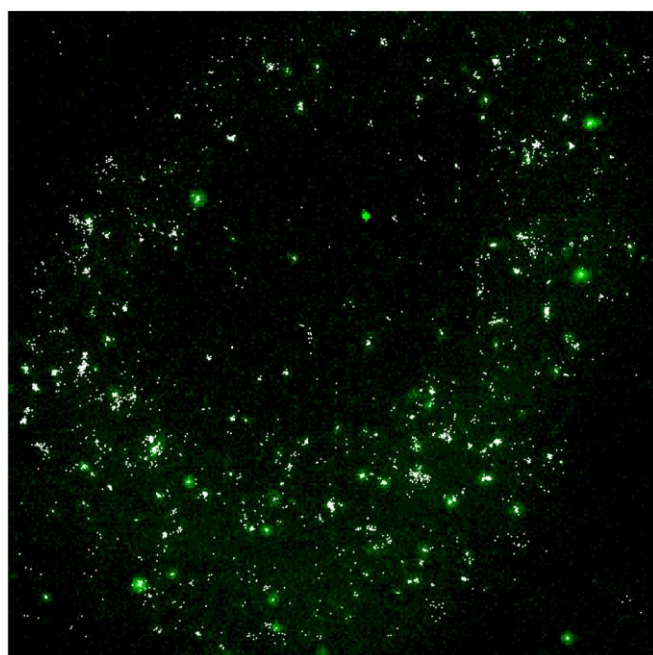

**Supplementary figure 3. ADEMScode is used to detect foci within PaTCH microscopy images.** GFP-CCR5 expressing CHO cell imaged using PaTCH microscopy with an overlay (white) showing tracks determined by ADEMScode tracking (MATLAB).
